# Supplementary material
Source: publisher figshare collection journal article supplement (https://karger.figshare.com/articles/dataset/_/26014612)
Supplement: Supplementary file 1 [file 1]

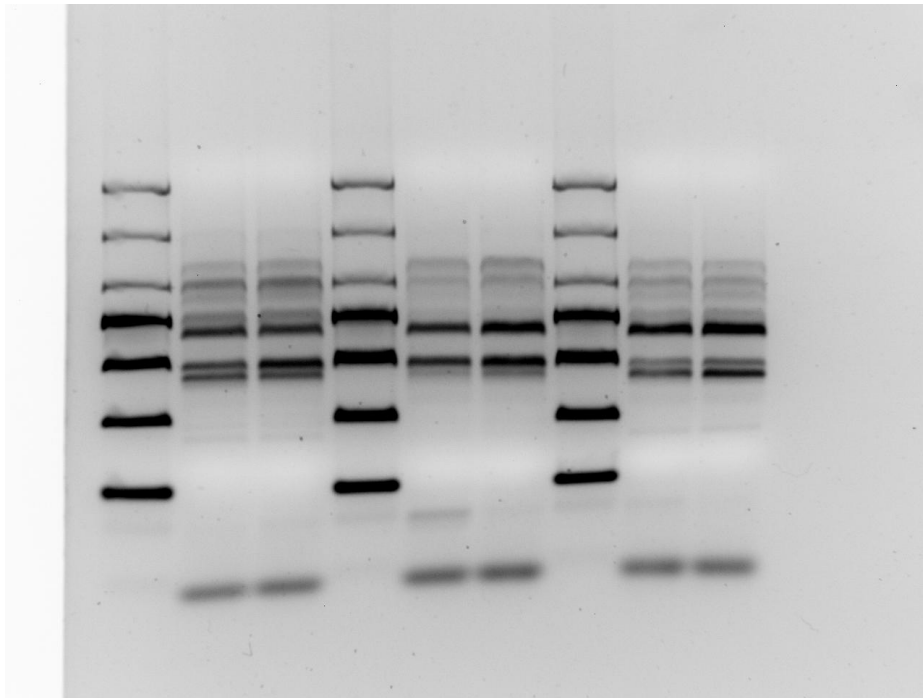

Figure 2A.

Agarose gel diagram of BCL2L1 endogenous splicesomes.

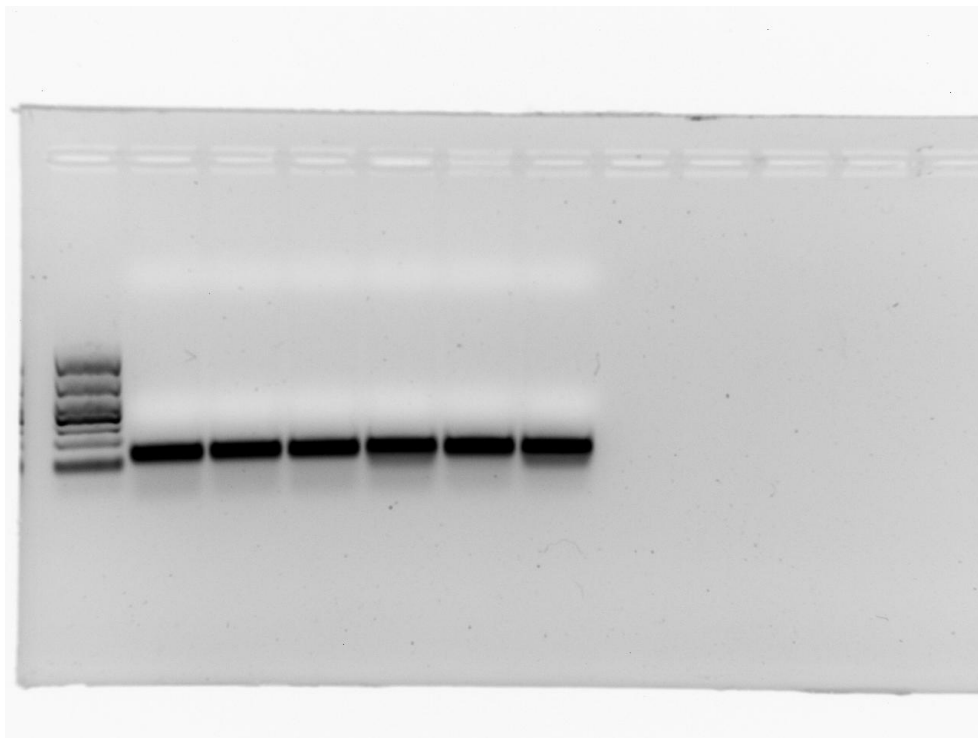

Figure 2A.

Agarose gel diagram of  $\beta$ -actin (internal reference gene)

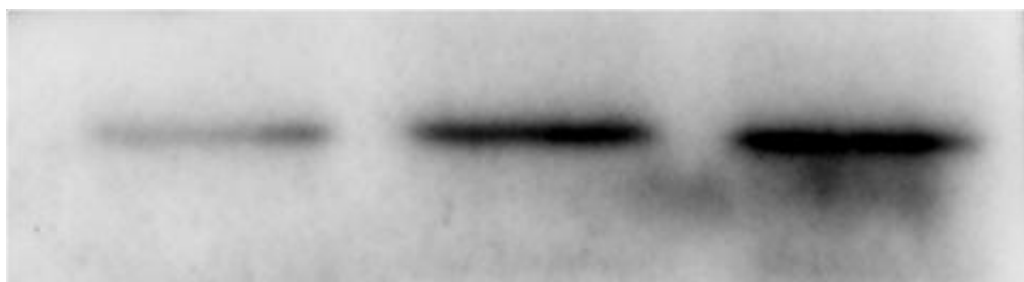

Figure 2J.

Western blotting bands after overexpression of SRSF1 in K562 cells:

K562 Cleaved caspase3 (line2: Vector; line3: experimental group)

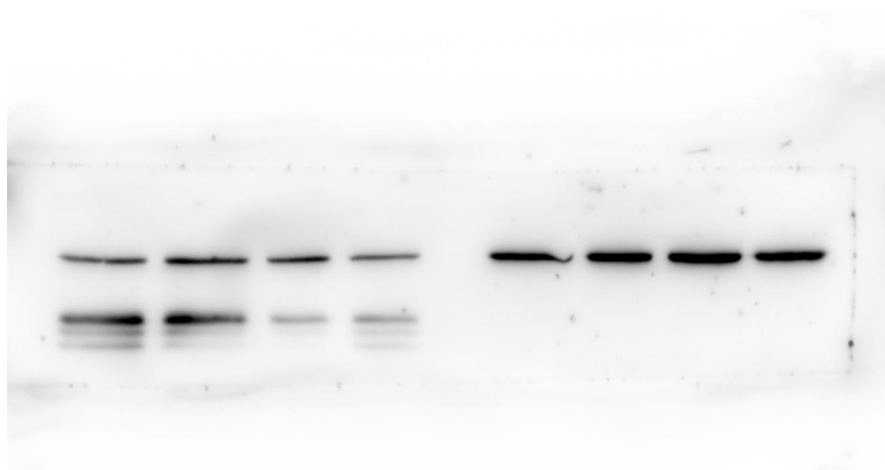

K562 Cleaved caspase8 (line3: Vector; line4: experimental group)

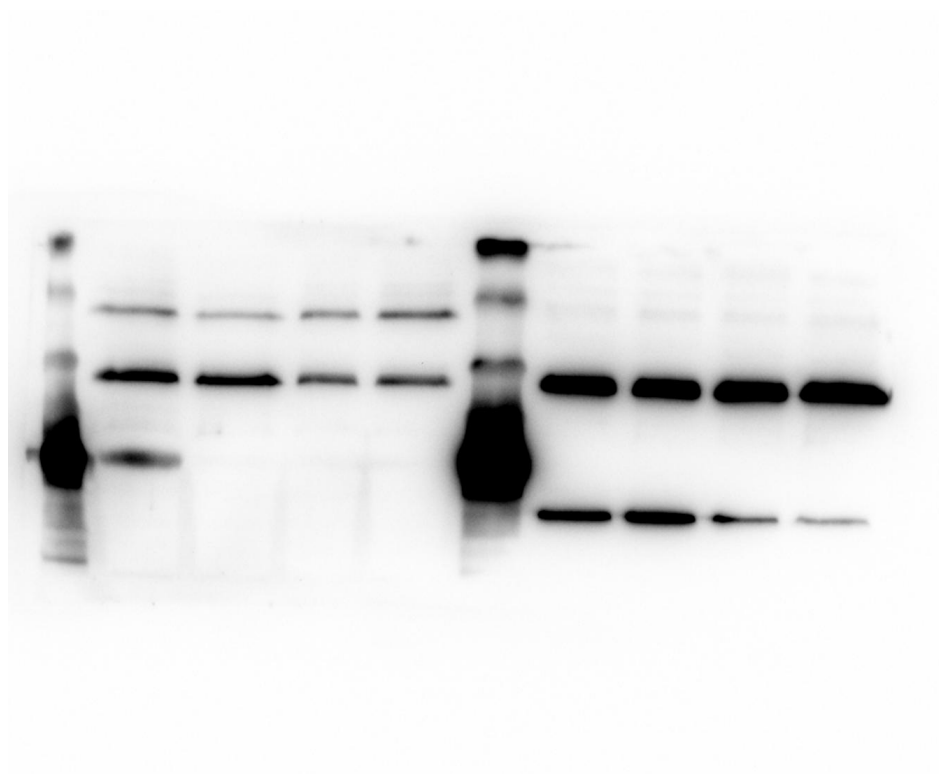

K562 Cleaved caspase9 (line1: Vector; line2: experimental group)

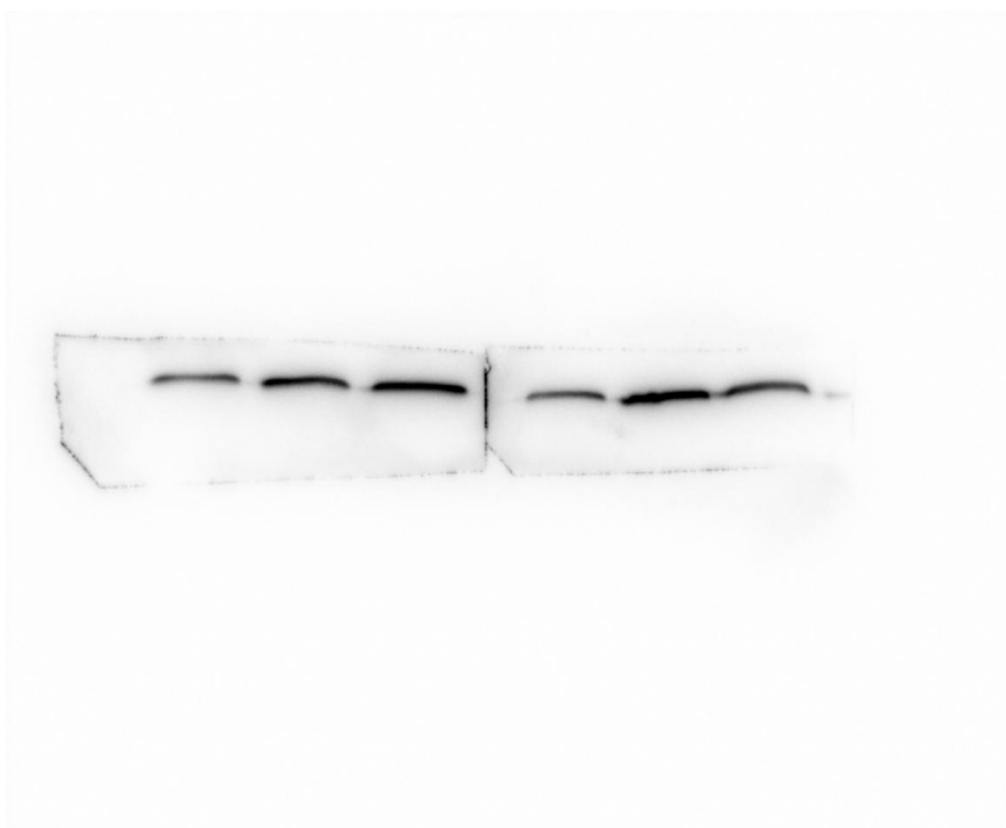

K562  $\beta$ -Tubulin (line2: Vector; line3: experimental group)

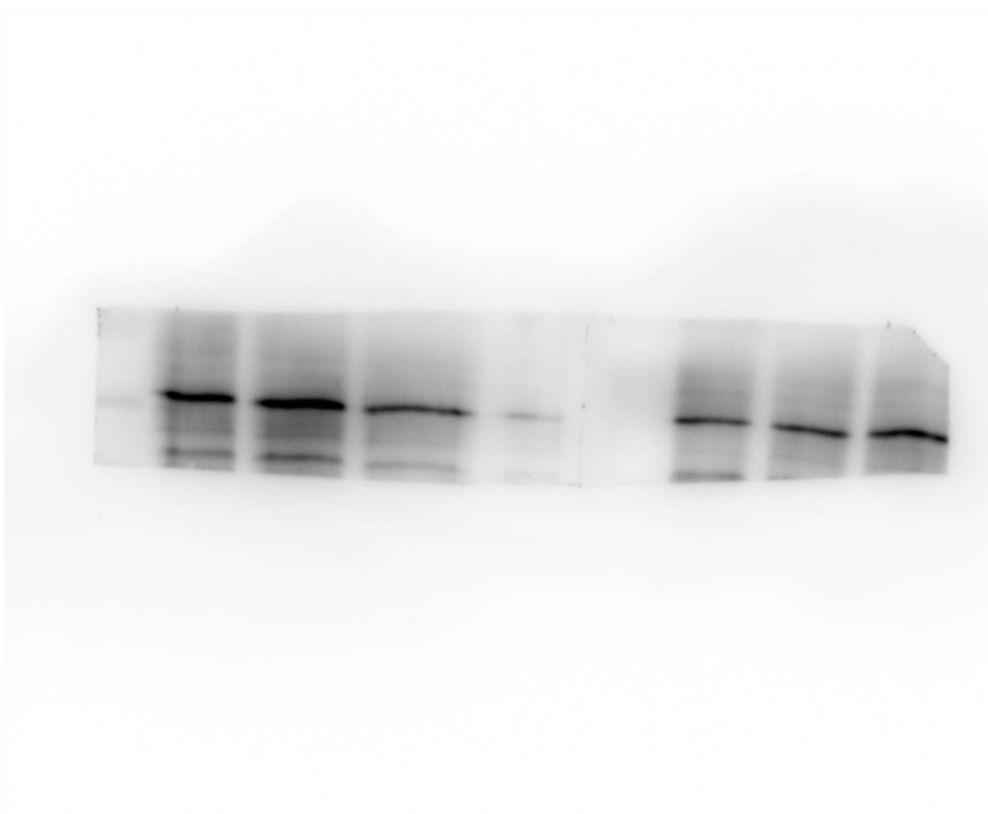

Western blotting bands after overexpression of SRSF1 in THP-1 cells:

THP-1 Cleaved caspase3 (line2: Vector; line3: experimental group)

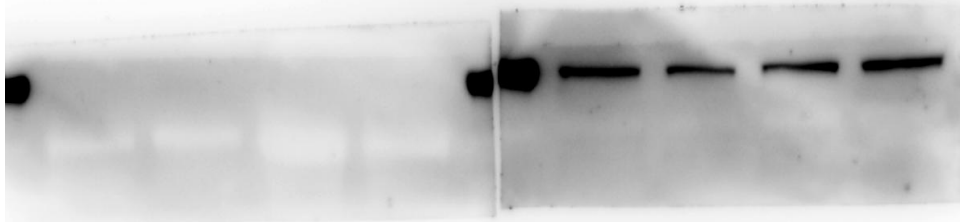

THP-1 Cleaved caspase8 (line5: Vector; line6: experimental group)

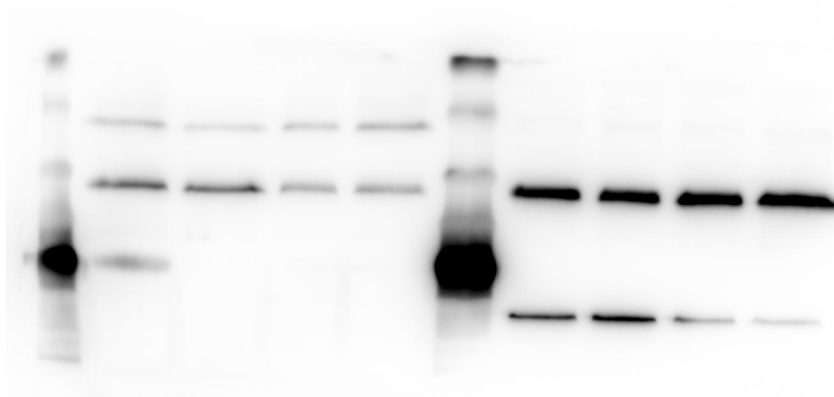

THP-1 Cleaved caspase9 (line5: Vector; line6: experimental group)

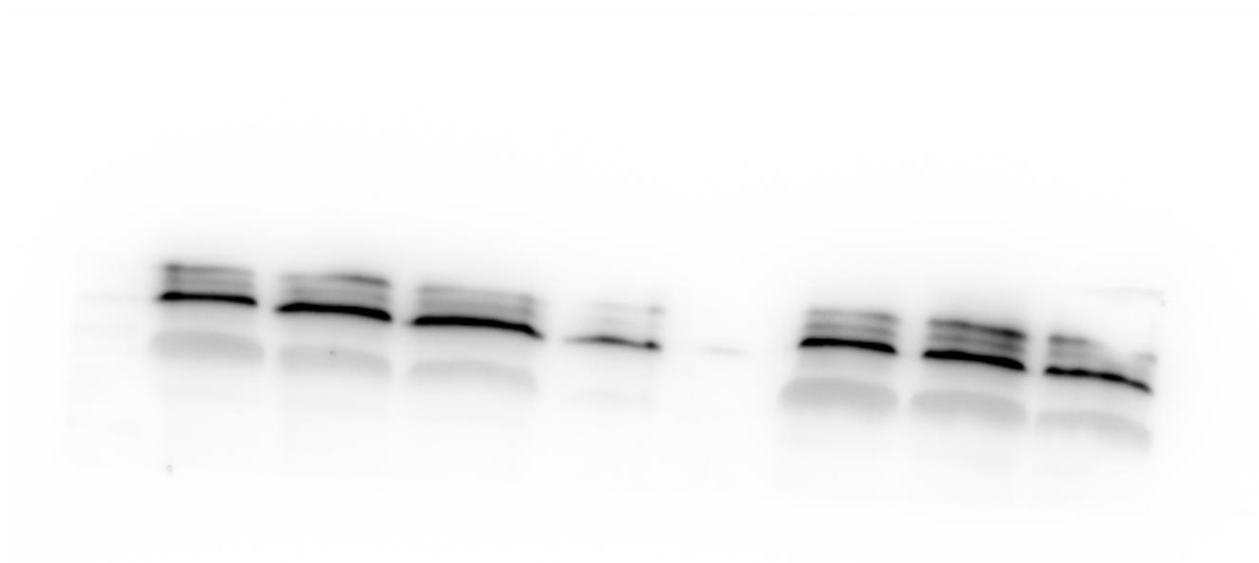

THP-1  $\beta$ -Tubulin (line5: Vector; line6: experimental group)

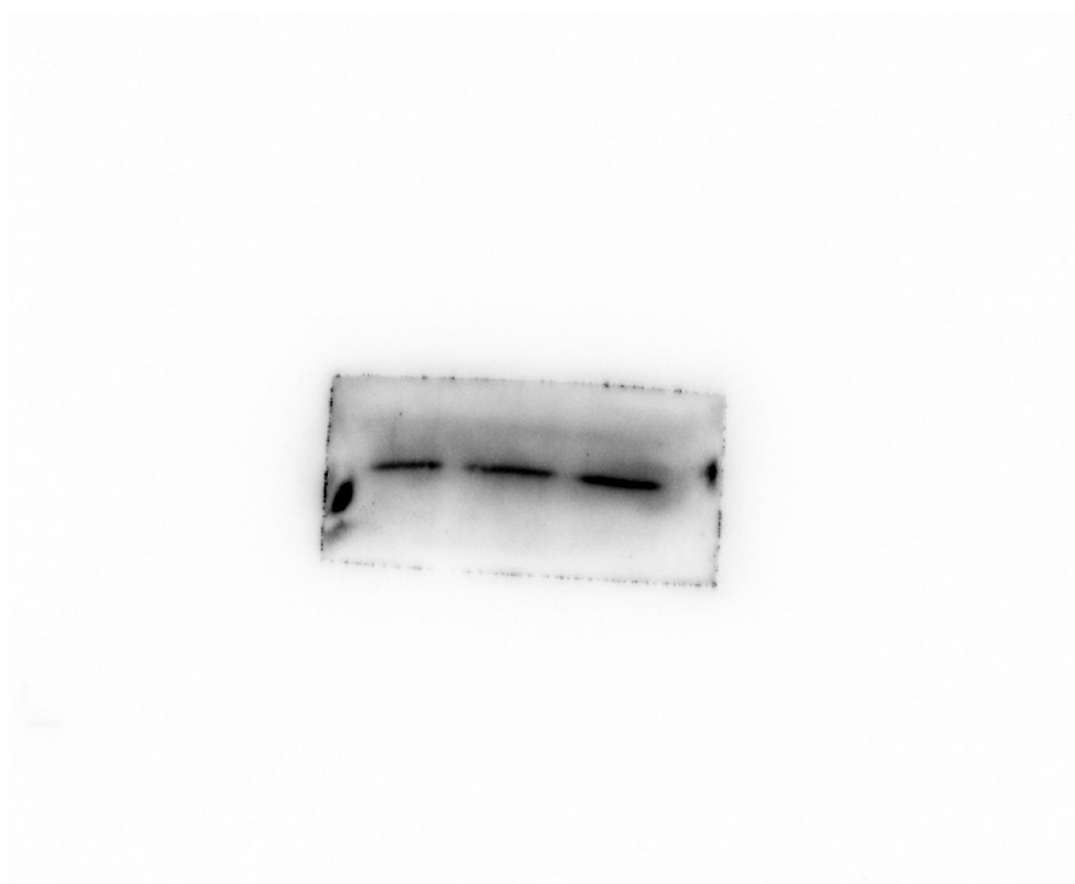

Figure 3F.

Western blotting band after knockdown of SRSF1 in K562 cells:

K562 Cleaved caspase3 (line2: Vector; line3: experimental group)

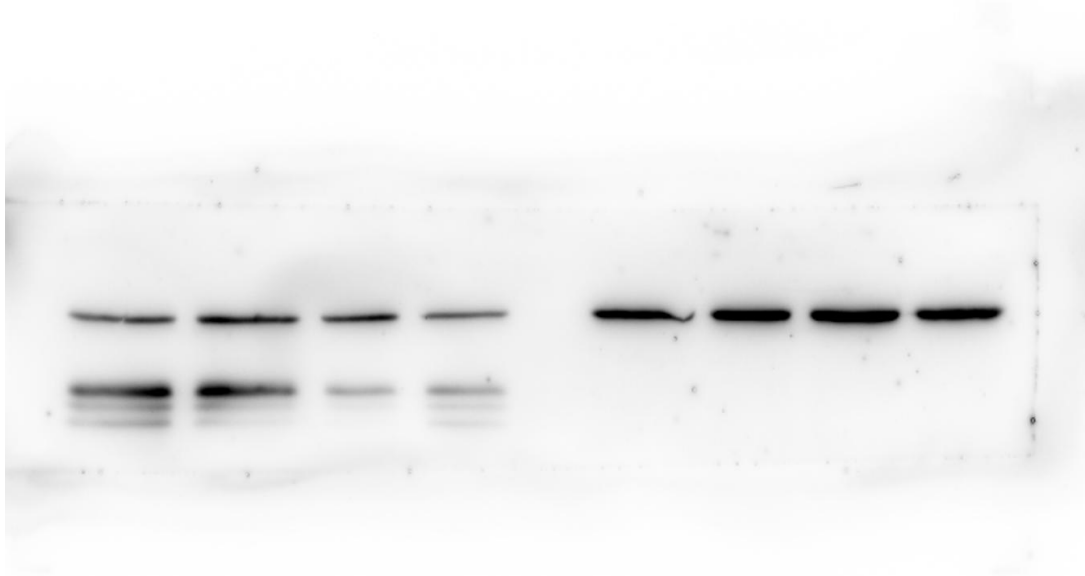

K562 Cleaved caspase8 (line1: Vector; line2: experimental group)

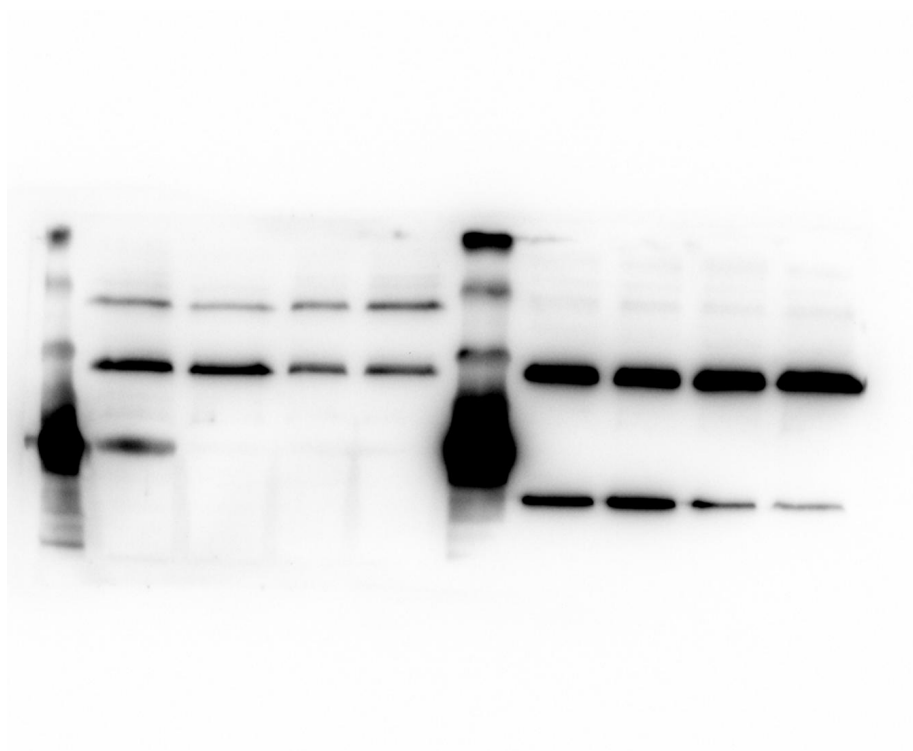

K562 Cleaved caspase9 (line3: Vector; line4: experimental group)

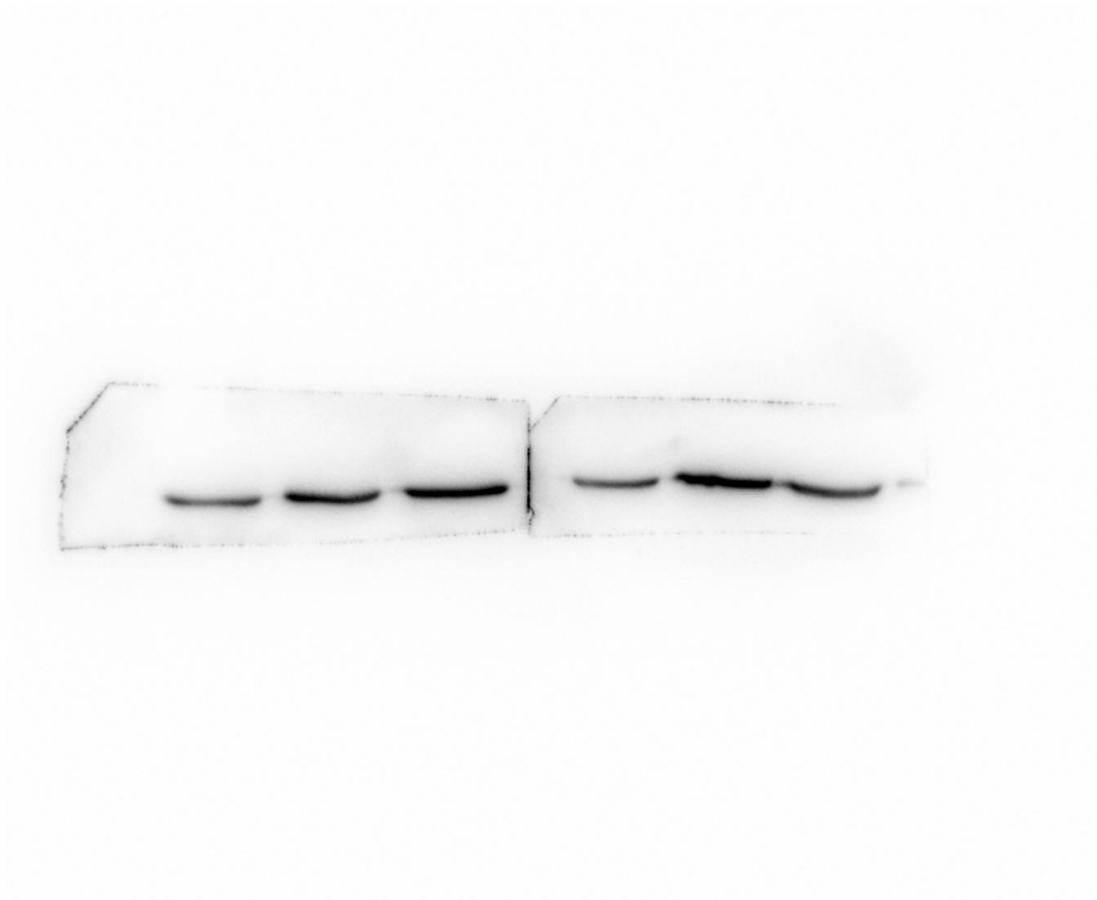

K562  $\beta$ -Tubulin (line5: Vector; line6: experimental group)



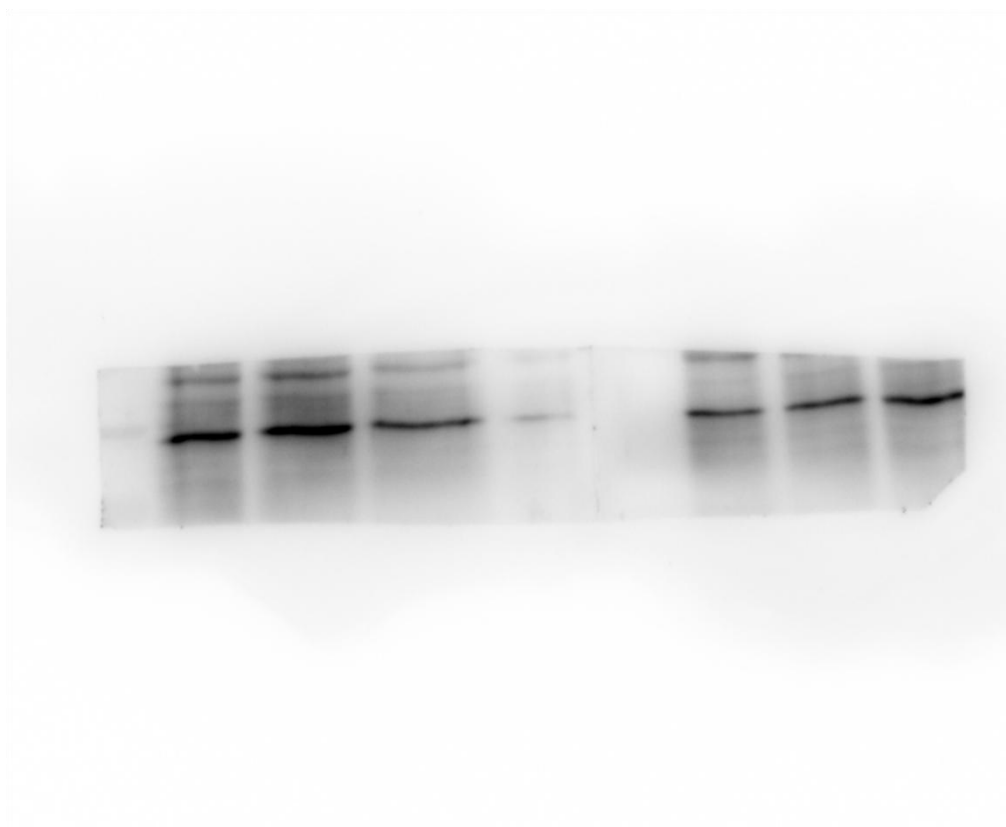

THP-1 Cleaved caspase3 (line5: Vector; line6: experimental group)

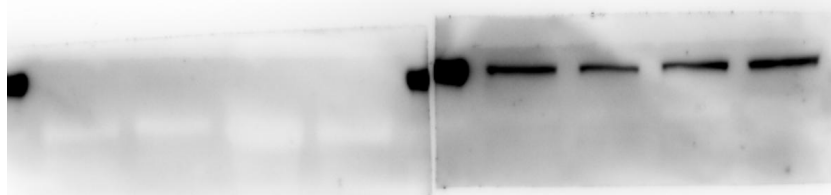

THP-1 Cleaved caspase8 (line7: Vector; line8: experimental group)

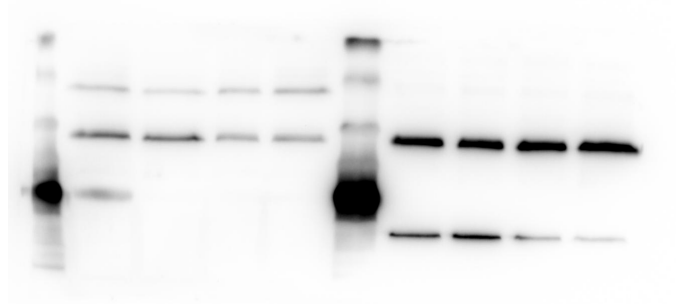

THP-1 Cleaved caspase9 (line7: Vector; line8: experimental group)

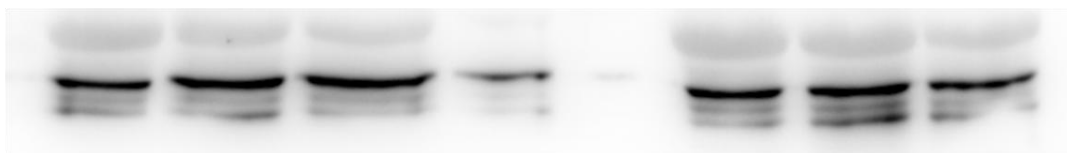

THP-1 β-Tubulin (line5: Vector; line6: experimental group)

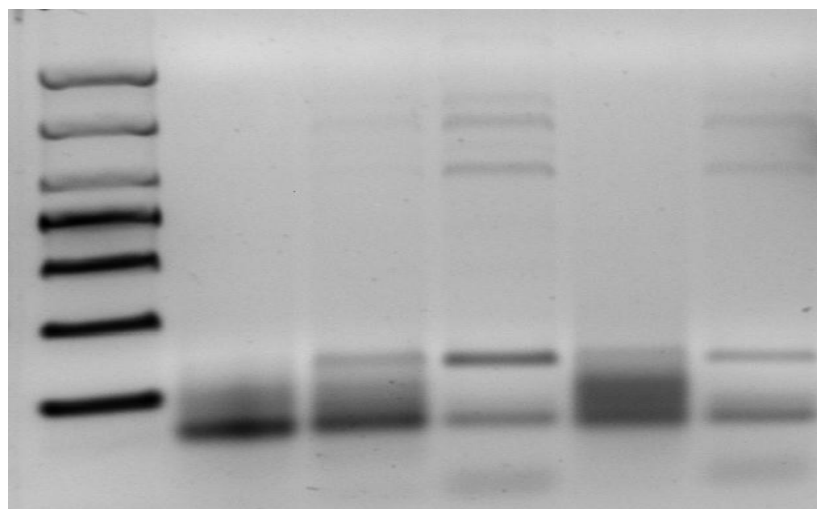

M WT 184 A>G 179A>G 190A>G All mut

Figure 4C

Agarose gel diagram of wild type and mutant minigene spliceosomes
