# Supplementary material
Source: publisher figshare collection journal article supplement (https://karger.figshare.com/articles/dataset/_/26014612)
Supplement: Supplementary file 2 [file 1]

Figure2 A-D.Grayscale analysis of endogenous spliceosomes

|         | Grayscale value | Lane1 | Lane2 | Lane3 | Lane4  | Lane5  | Lane6  | ACTB   | ACTB mean   | Lane1/ACTB mean | Lane2/ACTB mean | Lane3/ACTB mean | Lane4/ACTB mean | Lane5/ACTB mean | Lane6/ACTB mean |
|---------|-----------------|-------|-------|-------|--------|--------|--------|--------|-------------|-----------------|-----------------|-----------------|-----------------|-----------------|-----------------|
| HEK-293 | vec             | 15130 | 63973 | 84715 | 163512 | 133108 | 114591 | 448022 | 452030.6667 | 0.033471178     | 0.141523574     | 0.187409837     | 0.361727644     | 0.294466725     | 0.253502694     |
|         |                 | 16366 | 64448 | 77891 | 169170 | 128151 | 142006 | 452111 |             | 0.036205506     | 0.142574387     | 0.172313518     | 0.374244493     | 0.283500656     | 0.314151229     |
|         |                 | 15849 | 67720 | 70661 | 172758 | 123638 | 126765 | 455959 |             | 0.035061778     | 0.149812834     | 0.156319029     | 0.382182007     | 0.273516821     | 0.280434493     |
|         | SRSF1           | 17037 | 80302 | 83997 | 139751 | 219271 | 104006 | 436806 | 450029.3333 | 0.037857535     | 0.178437271     | 0.186647847     | 0.310537558     | 0.487237164     | 0.231109397     |
|         |                 | 18840 | 80354 | 91121 | 156721 | 213350 | 124436 | 455563 |             | 0.041863941     | 0.178552819     | 0.202477928     | 0.348246214     | 0.474080243     | 0.276506441     |
|         |                 | 18137 | 83785 | 83509 | 152021 | 200280 | 113669 | 457719 |             | 0.04030182      | 0.186176767     | 0.185563473     | 0.33780245      | 0.44503769      | 0.252581332     |
|         | Grayscale value | Lane1 | Lane2 | Lane3 | Lane4  | Lane5  | Lane6  | ACTB   | ACTB mean   | Lane1/ACTB mean | Lane2/ACTB mean | Lane3/ACTB mean | Lane4/ACTB mean | Lane5/ACTB mean | Lane6/ACTB mean |
| K562    | vec             | 29761 | 26185 | 32912 | 164759 | 172583 | 56292  | 433085 | 439709      | 0.0676834       | 0.059550748     | 0.074849503     | 0.374700086     | 0.392493672     | 0.128021032     |
|         |                 | 31871 | 25542 | 27950 | 162040 | 171673 | 63718  | 442359 |             | 0.072482028     | 0.058088418     | 0.063564767     | 0.368516451     | 0.390424121     | 0.144909474     |
|         |                 | 31504 | 28101 | 32538 | 159335 | 156637 | 52873  | 443683 |             | 0.071647385     | 0.063908176     | 0.07399894      | 0.362364655     | 0.356228779     | 0.120245435     |
|         | SRSF1           | 42440 | 35927 | 49936 | 218902 | 232043 | 90614  | 445302 | 458317.6667 | 0.092599522     | 0.078388856     | 0.108954989     | 0.477620655     | 0.506292906     | 0.197710016     |
|         |                 | 45920 | 34240 | 41974 | 222390 | 231318 | 100927 | 457592 |             | 0.100192508     | 0.074708003     | 0.09158276      | 0.485231096     | 0.504711033     | 0.220211875     |
|         |                 | 45357 | 39373 | 49663 | 227937 | 206873 | 85685  | 472059 |             | 0.098964103     | 0.085907658     | 0.108359332     | 0.497334055     | 0.451374669     | 0.186955468     |
|         | Grayscale value | Lane1 | Lane2 | Lane3 | Lane4  | Lane5  | Lane6  | ACTB   | ACTB mean   | Lane1/ACTB mean | Lane2/ACTB mean | Lane3/ACTB mean | Lane4/ACTB mean | Lane5/ACTB mean | Lane6/ACTB mean |
| THP-1   | vec             | 19783 | 42019 | 53119 | 220964 | 82492  | 121141 | 448420 | 457001.3333 | 0.043288717     | 0.091945034     | 0.116233805     | 0.483508471     | 0.180507145     | 0.265078021     |
|         |                 | 21480 | 42632 | 46951 | 221904 | 86952  | 130372 | 459822 |             | 0.047002054     | 0.093286387     | 0.102737126     | 0.485565358     | 0.190266417     | 0.285277088     |
|         |                 | 21124 | 44263 | 52565 | 223266 | 87159  | 122053 | 462762 |             | 0.046223063     | 0.096855304     | 0.115021555     | 0.488545656     | 0.19071937      | 0.267073639     |
|         | SRSF1           | 14146 | 36553 | 65255 | 248801 | 99905  | 167505 | 461537 | 475650.3333 | 0.029740337     | 0.07684847      | 0.137191125     | 0.523075461     | 0.210038748     | 0.35215998      |
|         |                 | 15555 | 44263 | 56509 | 251544 | 105680 | 177595 | 477902 |             | 0.032702597     | 0.093057856     | 0.118803667     | 0.528842303     | 0.22218002      | 0.373373043     |
|         |                 | 15133 | 38890 | 63558 | 255325 | 105650 | 167768 | 487512 |             | 0.03181539      | 0.081761743     | 0.133623378     | 0.53679142      | 0.222116949     | 0.352712907     |

Figure 2E.Raw data of SRSF1 overexpression efficiency in K562 and THP-1 cells

Block Ty196well  
 Chemistry SYBR\_GREEN  
 Experiment S:\wqr\293T K562 THP1.eds  
 Experiment 2022-04-26 18:26:05 PM PDT  
 Instrument steponeplus  
 Passive R ROX

| Well | Sample Name | Target Na | Task | Reporter | Quencher | RQ          | RQ Min      | RQ Max      | Ct           | Ct Mean     | Ct SD       | ΔCt          | ΔCt Mean    | ΔCt SE | HK | HK ΔΔCt      | Automatic Ct | Threshold   | Automatic Baseline | Baseline SE | Efficiency | Tm1 | Tm2         | Tm3 | Comment | OUTLIER | RRG |
|------|-------------|-----------|------|----------|----------|-------------|-------------|-------------|--------------|-------------|-------------|--------------|-------------|--------|----|--------------|--------------|-------------|--------------------|-------------|------------|-----|-------------|-----|---------|---------|-----|
| B3   | 293T vec    | ACTB      | UNK  | ISYBR    | None     |             |             |             | 17.93872452  | 17.64884758 | 0.254298657 |              |             |        |    |              | TRUE         | 1.281060283 | TRUE               | 3           | 11         | 1   | 86.43570709 |     | N       |         |     |
| B4   | 293T vec    | ACTB      | UNK  | ISYBR    | None     |             |             |             | 17.54449272  | 17.64884758 | 0.254298657 |              |             |        |    |              | TRUE         | 1.281060283 | TRUE               | 3           | 10         | 1   | 86.43570709 |     | N       |         |     |
| B5   | 293T vec    | ACTB      | UNK  | ISYBR    | None     |             |             |             | 17.463332932 | 17.64884758 | 0.254298657 |              |             |        |    |              | TRUE         | 1.281060283 | TRUE               | 3           | 10         | 1   | 86.58506775 |     | N       |         |     |
| B6   | 293T vec    | SRSF1     | UNK  | ISYBR    | None     | 1           | 0.728302836 | 1.37305522  | 17.92930031  | 17.86030579 | 0.129419193 | 0.21145694   | 0.164739311 |        |    | 0            | TRUE         | 0.315441957 | TRUE               | 3           | 12         | 1   | 81.95567322 |     | N       |         |     |
| B7   | 293T vec    | SRSF1     | UNK  | ISYBR    | None     | 1           | 0.728302836 | 1.37305522  | 17.94060898  | 17.86030579 | 0.129419193 | 0.21145694   | 0.164739311 |        |    | 0            | TRUE         | 0.315441957 | TRUE               | 3           | 12         | 1   | 81.80752563 |     | N       |         |     |
| B8   | 293T vec    | SRSF1     | UNK  | ISYBR    | None     | 1           | 0.728302836 | 1.37305522  | 17.71100807  | 17.86030579 | 0.129419193 | 0.21145694   | 0.164739311 |        |    | 0            | TRUE         | 0.315441957 | TRUE               | 3           | 12         | 1   | 81.80752563 |     | N       |         |     |
| C3   | 293T SRSF1  | ACTB      | UNK  | ISYBR    | None     |             |             |             | 17.6417923   | 17.41204071 | 0.199239582 |              |             |        |    |              | TRUE         | 1.281060283 | TRUE               | 3           | 10         | 1   | 86.43570709 |     | N       |         |     |
| C4   | 293T SRSF1  | ACTB      | UNK  | ISYBR    | None     |             |             |             | 17.28680801  | 17.41204071 | 0.199239582 |              |             |        |    |              | TRUE         | 1.281060283 | TRUE               | 3           | 10         | 1   | 86.43570709 |     | N       |         |     |
| C5   | 293T SRSF1  | ACTB      | UNK  | ISYBR    | None     |             |             |             | 17.30752373  | 17.41204071 | 0.199239582 |              |             |        |    |              | TRUE         | 1.281060283 | TRUE               | 3           | 10         | 1   | 86.43572998 |     | N       |         |     |
| C6   | 293T SRSF1  | SRSF1     | UNK  | ISYBR    | None     | 30.82931328 | 23.38645935 | 40.64089584 | 12.84900093  | 12.67726612 | 0.148813084 | -4.734774113 | 0.14357546  |        |    | -4.946230888 | TRUE         | 0.315441957 | TRUE               | 3           | 7          | 1   | 81.95567322 |     | N       |         |     |
| C7   | 293T SRSF1  | SRSF1     | UNK  | ISYBR    | None     | 30.82931328 | 23.38645935 | 40.64089584 | 12.58629894  | 12.67726612 | 0.148813084 | -4.734774113 | 0.14357546  |        |    | -4.946230888 | TRUE         | 0.315441957 | TRUE               | 3           | 7          | 1   | 81.80752563 |     | N       |         |     |
| C8   | 293T SRSF1  | SRSF1     | UNK  | ISYBR    | None     | 30.82931328 | 23.38645935 | 40.64089584 | 12.5965023   | 12.67726612 | 0.148813084 | -4.734774113 | 0.14357546  |        |    | -4.946230888 | TRUE         | 0.315441957 | TRUE               | 3           | 7          | 1   | 81.80752563 |     | N       |         |     |
| D3   | K562 vec    | ACTB      | UNK  | ISYBR    | None     |             |             |             | 18.44092941  | 18.43311882 | 0.017183745 |              |             |        |    |              | TRUE         | 1.281060283 | TRUE               | 3           | 11         | 1   | 86.43570709 |     | N       |         |     |
| D4   | K562 vec    | ACTB      | UNK  | ISYBR    | None     |             |             |             | 18.44501114  | 18.43311882 | 0.017183745 |              |             |        |    |              | TRUE         | 1.281060283 | TRUE               | 3           | 11         | 1   | 86.43570709 |     | N       |         |     |
| D5   | K562 vec    | ACTB      | UNK  | ISYBR    | None     |             |             |             | 18.41341782  | 18.43311882 | 0.017183745 |              |             |        |    |              | TRUE         | 1.281060283 | TRUE               | 3           | 11         | 1   | 86.43572998 |     | N       |         |     |
| D6   | K562 vec    | SRSF1     | UNK  | ISYBR    | None     | 0.892318726 | 0.613713205 | 1.297401905 | 19.12582016  | 18.80894661 | 0.336430311 | 0.375825882  | 0.194491327 |        |    | 0.164368942  | TRUE         | 0.315441957 | TRUE               | 3           | 14         | 1   | 81.80633545 |     | N       |         |     |
| D7   | K562 vec    | SRSF1     | UNK  | ISYBR    | None     | 0.892318726 | 0.613713205 | 1.297401905 | 18.84513092  | 18.80894661 | 0.336430311 | 0.375825882  | 0.194491327 |        |    | 0.164368942  | TRUE         | 0.315441957 | TRUE               | 3           | 13         | 1   | 81.65818787 |     | N       |         |     |
| D8   | K562 vec    | SRSF1     | UNK  | ISYBR    | None     | 0.892318726 | 0.613713205 | 1.297401905 | 18.45588493  | 18.80894661 | 0.336430311 | 0.375825882  | 0.194491327 |        |    | 0.164368942  | TRUE         | 0.315441957 | TRUE               | 3           | 13         | 1   | 81.65818787 |     | N       |         |     |
| E3   | K562 SRSF1  | ACTB      | UNK  | ISYBR    | None     |             |             |             | 19.16591072  | 19.39246941 | 0.377968907 |              |             |        |    |              | TRUE         | 1.281060283 | TRUE               | 3           | 12         | 1   | 86.43570709 |     | N       |         |     |
| E4   | K562 SRSF1  | ACTB      | UNK  | ISYBR    | None     |             |             |             | 19.18269348  | 19.39246941 | 0.377968907 |              |             |        |    |              | TRUE         | 1.281060283 | TRUE               | 3           | 12         | 1   | 86.43570709 |     | N       |         |     |
| E5   | K562 SRSF1  | ACTB      | UNK  | ISYBR    | None     |             |             |             | 19.82880211  | 19.39246941 | 0.377968907 |              |             |        |    |              | TRUE         | 1.281060283 | TRUE               | 3           | 12         | 1   | 86.43572998 |     | Y       |         |     |
| E6   | K562 SRSF1  | SRSF1     | UNK  | ISYBR    | None     | 160.013916  | 95.09272766 | 269.2577515 | 12.04802608  | 12.2818718  | 0.276606619 | -7.110596657 | 0.270414323 |        |    | -7.322053432 | TRUE         | 0.315441957 | TRUE               | 3           | 7          | 1   | 81.80633545 |     | N       |         |     |
| E7   | K562 SRSF1  | SRSF1     | UNK  | ISYBR    | None     | 160.013916  | 95.09272766 | 269.2577515 | 12.58720493  | 12.2818718  | 0.276606619 | -7.110596657 | 0.270414323 |        |    | -7.322053432 | TRUE         | 0.315441957 | TRUE               | 3           | 7          | 1   | 81.80752563 |     | N       |         |     |
| E8   | K562 SRSF1  | SRSF1     | UNK  | ISYBR    | None     | 160.013916  | 95.09272766 | 269.2577515 | 12.21038532  | 12.2818718  | 0.276606619 | -7.110596657 | 0.270414323 |        |    | -7.322053432 | TRUE         | 0.315441957 | TRUE               | 3           | 7          | 1   | 81.80752563 |     | N       |         |     |
| F3   | THP1 vec    | ACTB      | UNK  | ISYBR    | None     |             |             |             | 16.59752655  | 16.83661079 | 0.207266584 |              |             |        |    |              | TRUE         | 1.281060283 | TRUE               | 3           | 9          | 1   | 86.58503723 |     | N       |         |     |
| F4   | THP1 vec    | ACTB      | UNK  | ISYBR    | None     |             |             |             | 16.94673347  | 16.83661079 | 0.207266584 |              |             |        |    |              | TRUE         | 1.281060283 | TRUE               | 3           | 9          | 1   | 86.58503723 |     | N       |         |     |
| F5   | THP1 vec    | ACTB      | UNK  | ISYBR    | None     |             |             |             | 16.96557045  | 16.83661079 | 0.207266584 |              |             |        |    |              | TRUE         | 1.281060283 | TRUE               | 3           | 9          | 1   | 86.58506775 |     | N       |         |     |
| F6   | THP1 vec    | SRSF1     | UNK  | ISYBR    | None     | 0.184915841 | 0.142736748 | 0.23955898  | 19.40982819  | 19.48312569 | 0.106464162 | 2.646516085  | 0.134528875 |        |    | 2.435059309  | TRUE         | 0.315441957 | TRUE               | 3           | 14         | 1   | 81.80633545 |     | N       |         |     |
| F7   | THP1 vec    | SRSF1     | UNK  | ISYBR    | None     | 0.184915841 | 0.142736748 | 0.23955898  | 19.60524559  | 19.48312569 | 0.106464162 | 2.646516085  | 0.134528875 |        |    | 2.435059309  | TRUE         | 0.315441957 | TRUE               | 3           | 14         | 1   | 81.65818787 |     | N       |         |     |
| F8   | THP1 vec    | SRSF1     | UNK  | ISYBR    | None     | 0.184915841 | 0.142736748 | 0.23955898  | 19.43430519  | 19.48312569 | 0.106464162 | 2.646516085  | 0.134528875 |        |    | 2.435059309  | TRUE         | 0.315441957 | TRUE               | 3           | 14         | 1   | 81.65818787 |     | N       |         |     |
| G3   | THP1 SRSF1  | ACTB      | UNK  | ISYBR    | None     |             |             |             | 16.35424232  | 16.23180962 | 0.240346998 |              |             |        |    |              | TRUE         | 1.281060283 | TRUE               | 3           | 9          | 1   | 86.58503723 |     | N       |         |     |
| G4   | THP1 SRSF1  | ACTB      | UNK  | ISYBR    | None     |             |             |             | 16.38628769  | 16.23180962 | 0.240346998 |              |             |        |    |              | TRUE         | 1.281060283 | TRUE               | 3           | 8          | 1   | 86.58503723 |     | N       |         |     |
| G5   | THP1 SRSF1  | ACTB      | UNK  | ISYBR    | None     |             |             |             | 15.95489788  | 16.23180962 | 0.240346998 |              |             |        |    |              | TRUE         | 1.281060283 | TRUE               | 3           | 8          | 1   | 86.58506775 |     | N       |         |     |
| G6   | THP1 SRSF1  | SRSF1     | UNK  | ISYBR    | None     | 31.72795486 | 22.70845222 | 44.3298912  | 11.37279892  | 11.45558453 | 0.18123132  | -4.776225567 | 0.173792467 |        |    | -4.987682819 | TRUE         | 0.315441957 | TRUE               | 3           | 6          | 1   | 81.95567322 |     | N       |         |     |
| G7   | THP1 SRSF1  | SRSF1     | UNK  | ISYBR    | None     | 31.72795486 | 22.70845222 | 44.3298912  | 11.33052826  | 11.45558453 | 0.18123132  | -4.776225567 | 0.173792467 |        |    | -4.987682819 | TRUE         | 0.315441957 | TRUE               | 3           | 6          | 1   | 81.80752563 |     | N       |         |     |
| G8   | THP1 SRSF1  | SRSF1     | UNK  | ISYBR    | None     | 31.72795486 | 22.70845222 | 44.3298912  | 11.66342354  | 11.45558453 | 0.18123132  | -4.776225567 | 0.173792467 |        |    | -4.987682819 | TRUE         | 0.315441957 | TRUE               | 3           | 6          | 1   | 81.9568634  |     | N       |         |     |

Analysis Singleplex  
 Endogene ACTB  
 RQ Min/195.0  
 Reference 293T vec

Figure 2F. Raw data of cell proliferation rate after overexpression of SRSF1 in K562 cells (CCK-8 assay)

| 24h | GFP         |             |         | control |         |          | blank       |             |         | GFP-blank   |          |          | control-blank |          |          | (GFP-blank) /(control-blank)   |             |             |          |
|-----|-------------|-------------|---------|---------|---------|----------|-------------|-------------|---------|-------------|----------|----------|---------------|----------|----------|--------------------------------|-------------|-------------|----------|
|     | 1           | 0.645       | 0.658   | 0.622   | 0.607   | 0.657    | 0.725       | 0.147       | 0.146   | 0.148       |          |          |               |          |          |                                |             |             |          |
|     | 2           | 0.669       | 0.69    | 0.652   | 0.646   | 0.706    | 0.781       | 0.147       | 0.147   | 0.148       |          |          |               |          |          |                                |             |             |          |
|     | 3           | 0.742       | 0.79    | 0.745   | 0.754   | 0.819    | 0.902       | 0.148       | 0.148   | 0.15        |          |          |               |          |          |                                |             |             |          |
|     | 4           | 0.807       | 0.887   | 0.829   | 0.829   | 0.877    | 0.978       | 0.148       | 0.148   | 0.15        |          |          |               |          |          |                                |             |             |          |
|     |             | 0.71575     | 0.75625 | 0.712   | 0.709   | 0.76475  | 0.8465      | 0.1475      | 0.14725 | 0.149       | 0.567833 | 0.608333 | 0.564083      | 0.561083 | 0.616833 | 0.698583                       | 0.907806555 | 0.972554756 | 0.901811 |
|     |             | 0.147916667 |         |         |         |          |             | 0.625499667 |         |             |          |          |               |          |          |                                |             |             |          |
|     | SRSF1       |             |         | control |         |          | blank       |             |         | SRSF1-blank |          |          | control-blank |          |          | (SRSF1-blank) /(control-blank) |             |             |          |
|     | 1           | 0.654       | 0.632   | 0.645   | 0.607   | 0.657    | 0.725       | 0.147       | 0.146   | 0.148       |          |          |               |          |          |                                |             |             |          |
|     | 2           | 0.686       | 0.661   | 0.688   | 0.646   | 0.706    | 0.781       | 0.147       | 0.147   | 0.148       |          |          |               |          |          |                                |             |             |          |
| 3   | 0.784       | 0.736       | 0.802   | 0.754   | 0.819   | 0.902    | 0.148       | 0.148       | 0.15    |             |          |          |               |          |          |                                |             |             |          |
| 4   | 0.878       | 0.801       | 0.891   | 0.829   | 0.877   | 0.978    | 0.148       | 0.148       | 0.15    |             |          |          |               |          |          |                                |             |             |          |
|     | 0.7505      | 0.7075      | 0.7565  | 0.709   | 0.76475 | 0.8465   | 0.1475      | 0.14725     | 0.149   | 0.602583    | 0.559583 | 0.608583 | 0.561083      | 0.616833 | 0.698583 | 0.96336211                     | 0.894617106 | 0.972954    |          |
|     | 0.147916667 |             |         |         |         |          | 0.625499667 |             |         |             |          |          |               |          |          |                                |             |             |          |
| 48h | GFP         |             |         | control |         |          | blank       |             |         | GFP-blank   |          |          | control-blank |          |          | (GFP-blank) /(control-blank)   |             |             |          |
|     | 1           | 0.871       | 0.961   | 0.953   | 0.925   | 0.947    | 1.017       | 0.144       | 0.145   | 0.145       |          |          |               |          |          |                                |             |             |          |
|     | 2           | 0.901       | 0.973   | 0.988   | 0.945   | 0.989    | 1.0721      | 0.144       | 0.146   | 0.145       |          |          |               |          |          |                                |             |             |          |
|     | 3           | 0.998       | 1.059   | 1.056   | 1.049   | 1.137    | 1.228       | 0.145       | 0.147   | 0.145       |          |          |               |          |          |                                |             |             |          |
|     | 4           | 1.181       | 1.228   | 1.206   | 1.242   | 1.311    | 1.387       | 0.145       | 0.147   | 0.145       |          |          |               |          |          |                                |             |             |          |
|     |             | 0.98775     | 1.05525 | 1.05075 | 1.04025 | 1.096    | 1.176025    | 0.1445      | 0.14625 | 0.145       | 0.8425   | 0.91     | 0.9055        | 0.895    | 0.95075  | 1.030775                       | 0.878664055 | 0.949061472 | 0.944368 |
|     |             | 0.14525     |         |         |         |          |             | 0.958841667 |         |             |          |          |               |          |          |                                |             |             |          |
|     | SRSF1       |             |         | control |         |          | blank       |             |         | SRSF1-blank |          |          | control-blank |          |          | (SRSF1-blank) /(control-blank) |             |             |          |
|     | 1           | 1.292       | 1.181   | 1.21    | 0.925   | 0.947    | 1.017       | 0.144       | 0.145   | 0.145       |          |          |               |          |          |                                |             |             |          |
|     | 2           | 1.314       | 1.227   | 1.244   | 0.945   | 0.989    | 1.0721      | 0.144       | 0.146   | 0.145       |          |          |               |          |          |                                |             |             |          |
| 3   | 1.444       | 1.384       | 1.411   | 1.049   | 1.137   | 1.228    | 0.145       | 0.147       | 0.145   |             |          |          |               |          |          |                                |             |             |          |
| 4   | 1.668       | 1.608       | 1.648   | 1.242   | 1.311   | 1.387    | 0.145       | 0.147       | 0.145   |             |          |          |               |          |          |                                |             |             |          |
|     | 1.4295      | 1.35        | 1.37825 | 1.04025 | 1.096   | 1.176025 | 0.1445      | 0.14625     | 0.145   | 1.28425     | 1.20475  | 1.233    | 0.895         | 0.95075  | 1.030775 | 1.339376039                    | 1.256463526 | 1.285926    |          |
|     | 0.14525     |             |         |         |         |          | 0.958841667 |             |         |             |          |          |               |          |          |                                |             |             |          |
| 72h | GFP         |             |         | control |         |          | blank       |             |         | GFP-blank   |          |          | control-blank |          |          | (GFP-blank) /(control-blank)   |             |             |          |
|     | 1           | 0.779       | 0.892   | 0.86    | 1.081   | 0.875    | 0.835       | 0.141       | 0.139   | 0.144       |          |          |               |          |          |                                |             |             |          |
|     | 2           | 0.83        | 0.938   | 0.909   | 1.161   | 0.912    | 0.915       | 0.141       | 0.14    | 0.144       |          |          |               |          |          |                                |             |             |          |
|     | 3           | 1.016       | 1.078   | 1.14    | 1.288   | 1.086    | 1.111       | 0.14        | 0.139   | 0.145       |          |          |               |          |          |                                |             |             |          |
|     | 4           | 1.114       | 1.258   | 1.292   | 1.472   | 1.32     | 1.255       | 0.139       | 0.137   | 0.143       |          |          |               |          |          |                                |             |             |          |
|     |             | 0.93475     | 1.0415  | 1.05025 | 1.2505  | 1.04825  | 1.029       | 0.14025     | 0.13875 | 0.144       | 0.79375  | 0.9005   | 0.90925       | 1.1095   | 0.90725  | 0.888                          | 0.81977795  | 0.930028402 | 0.939065 |
|     |             |             |         |         |         |          |             | 0.141       |         |             |          |          |               | 0.96825  |          |                                |             |             |          |
|     | SRSF1       |             |         | control |         |          | blank       |             |         | SRSF1-blank |          |          | control-blank |          |          | (SRSF1-blank) /(control-blank) |             |             |          |
|     | 1           | 1.364       | 1.529   | 1.405   | 1.081   | 0.875    | 0.835       | 0.141       | 0.139   | 0.144       |          |          |               |          |          |                                |             |             |          |
|     | 2           | 1.425       | 1.688   | 1.522   | 1.161   | 0.912    | 0.915       | 0.141       | 0.14    | 0.144       |          |          |               |          |          |                                |             |             |          |
| 3   | 1.639       | 1.961       | 1.85    | 1.288   | 1.086   | 1.111    | 0.14        | 0.139       | 0.145   |             |          |          |               |          |          |                                |             |             |          |
| 4   | 1.94        | 2.096       | 2.148   | 1.472   | 1.32    | 1.255    | 0.139       | 0.137       | 0.143   |             |          |          |               |          |          |                                |             |             |          |
|     | 1.592       | 1.8185      | 1.73125 | 1.2505  | 1.04825 | 1.029    | 0.14025     | 0.13875     | 0.144   | 1.451       | 1.6775   | 1.59025  | 1.1095        | 0.90725  | 0.888    | 1.498579912                    | 1.7325071   | 1.642396    |          |
|     |             |             |         |         |         |          | 0.141       |             |         |             |          |          | 0.96825       |          |          |                                |             |             |          |



Figure 2J-K.Raw data of WB band analysis of apoptosis-related protein after overexpression of SRSF1 in K562 cells

|   | vector | $\beta$ -Tublin | Caspase3/ $\beta$ -Tublin | SRSF1  | $\beta$ -Tublin | Caspase3/ $\beta$ -Tublin |
|---|--------|-----------------|---------------------------|--------|-----------------|---------------------------|
| 1 | 263298 | 425127          | 0.619339633               | 281487 | 518951          | 0.542415373               |
| 2 | 230410 | 393878          | 0.58497809                | 250248 | 472336          | 0.529809288               |
| 3 | 255222 | 397485          | 0.642092154               | 282614 | 476460          | 0.593153675               |
|   | vector | $\beta$ -Tublin | Caspase8/ $\beta$ -Tublin | SRSF1  | $\beta$ -Tublin | Caspase8/ $\beta$ -Tublin |
| 1 | 223085 | 459258          | 0.485750929               | 180672 | 379195          | 0.476461979               |
| 2 | 216278 | 429714          | 0.503306851               | 174710 | 357032          | 0.489339891               |
| 3 | 218310 | 431441          | 0.506001979               | 175108 | 361365          | 0.484573769               |
|   | vector | $\beta$ -Tublin | Caspase9/ $\beta$ -Tublin | SRSF1  | $\beta$ -Tublin | Caspase9/ $\beta$ -Tublin |
| 1 | 553891 | 425127          | 1.302883609               | 555933 | 518951          | 1.07126299                |
| 2 | 562615 | 393878          | 1.428399149               | 565969 | 472336          | 1.198233884               |
| 3 | 557163 | 397485          | 1.40172082                | 570695 | 476460          | 1.197781556               |

Figure 2J-K.Raw data of WB band analysis of apoptosis-related protein after overexpression of SRSF1 in THP-1 cells

|   | vector | $\beta$ -Tublin | Caspase3/ $\beta$ -Tublin | SRSF1  | $\beta$ -Tublin | Caspase3/ $\beta$ -Tublin |
|---|--------|-----------------|---------------------------|--------|-----------------|---------------------------|
| 1 | 293608 | 389662          | 0.753494054               | 235491 | 434253          | 0.542289863               |
| 2 | 287086 | 373958          | 0.767695838               | 231492 | 392165          | 0.590292351               |
| 3 | 290201 | 385038          | 0.753694441               | 238688 | 425785          | 0.560583393               |

  

|   | vector | $\beta$ -Tublin | Caspase8/ $\beta$ -Tublin | SRSF1  | $\beta$ -Tublin | Caspase8/ $\beta$ -Tublin |
|---|--------|-----------------|---------------------------|--------|-----------------|---------------------------|
| 1 | 295691 | 389662          | 0.758839712               | 196258 | 434253          | 0.451943913               |
| 2 | 304314 | 373958          | 0.813765182               | 200071 | 392165          | 0.510170464               |
| 3 | 288897 | 385038          | 0.750307762               | 192749 | 425785          | 0.452690912               |

  

|   | vector | $\beta$ -Tublin | Caspase9/ $\beta$ -Tublin | SRSF1  | $\beta$ -Tublin | Caspase9/ $\beta$ -Tublin |
|---|--------|-----------------|---------------------------|--------|-----------------|---------------------------|
| 1 | 536090 | 389662          | 1.375782088               | 483376 | 434253          | 1.113120692               |
| 2 | 518662 | 373958          | 1.386952545               | 474642 | 392165          | 1.210311986               |
| 3 | 538966 | 385038          | 1.399773529               | 497295 | 425785          | 1.167948613               |

Figure 2L.Drug susceptibility test data (CCK-8 assay)

| group  | Drug concentration/μM |          | experimental group/As |       |       | control/Ac |       |       | blank/Ab |       | 0.274 | (As-Ab) |       |       | (Ac-Ab) | Inhibition rate=[(Ac-As) / (Ac-Ab)] × 100% |       |       |
|--------|-----------------------|----------|-----------------------|-------|-------|------------|-------|-------|----------|-------|-------|---------|-------|-------|---------|--------------------------------------------|-------|-------|
| vector | 1                     | 20       | 0.661                 | 0.737 | 1.387 | 1.299      | 1.536 | 1.622 | 0.294    | 0.311 | 0.101 |         |       |       |         |                                            |       |       |
|        |                       |          | 0.666                 | 0.735 | 1.376 | 1.302      | 1.567 | 1.640 | 0.295    | 0.313 | 0.100 |         |       |       |         |                                            |       |       |
|        |                       |          | 0.669                 | 0.745 | 1.396 | 1.324      | 1.600 | 1.675 | 0.295    | 0.313 | 0.099 |         |       |       |         |                                            |       |       |
|        |                       |          | 0.665                 | 0.739 | 1.386 | 1.308      | 1.568 | 1.646 | 0.295    | 0.312 | 0.304 |         |       |       |         |                                            |       |       |
| SRSF1  |                       |          |                       |       |       | 1.507      |       |       | 0.304    |       |       | 0.391   | 0.465 | 1.112 | 1.213   | 0.323                                      | 0.383 | 0.917 |
|        |                       |          | 0.574                 | 0.627 | 0.699 | 1.043      | 0.992 | 1.176 | 0.261    | 0.273 | 0.317 |         |       |       |         |                                            |       |       |
|        |                       |          | 0.581                 | 0.648 | 0.667 | 1.059      | 0.984 | 1.162 | 0.262    | 0.273 | 0.318 |         |       |       |         |                                            |       |       |
|        |                       |          | 0.585                 | 0.649 | 0.640 | 1.024      | 0.953 | 1.125 | 0.262    | 0.273 | 0.318 |         |       |       |         |                                            |       |       |
|        |                       |          | 0.907                 | 0.863 | 0.864 | 1.131      | 1.102 | 1.034 | 0.284    | 0.294 | 0.291 |         |       |       |         |                                            |       |       |
|        |                       |          | 0.662                 | 0.697 | 0.718 | 1.064      | 1.008 | 1.124 | 0.267    | 0.278 | 0.311 |         |       |       |         |                                            |       |       |
|        |                       |          |                       |       |       | 1.065      |       |       | 0.286    |       |       | 0.388   | 0.423 | 0.444 | 0.771   | 0.503                                      | 0.548 | 0.575 |
|        |                       |          |                       |       |       |            |       |       |          |       |       |         |       |       |         |                                            |       |       |
| vector | 2                     | 5        | 0.833                 | 0.751 | 1.055 | 1.822      | 1.766 | 2.204 | 0.255    | 0.262 | 0.301 |         |       |       |         |                                            |       |       |
|        |                       |          | 0.843                 | 0.795 | 0.953 | 1.644      | 1.532 | 1.957 | 0.255    | 0.262 | 0.303 |         |       |       |         |                                            |       |       |
|        |                       |          | 0.855                 | 0.792 | 0.897 | 1.551      | 1.428 | 1.846 | 0.255    | 0.262 | 0.302 |         |       |       |         |                                            |       |       |
|        |                       |          | 0.844                 | 0.779 | 0.968 | 1.672      | 1.575 | 2.002 | 0.255    | 0.262 | 0.302 |         |       |       |         |                                            |       |       |
|        |                       |          |                       |       |       | 1.750      |       |       | 0.273    |       |       | 0.570   | 0.505 | 0.694 | 1.456   | 0.391                                      | 0.347 | 0.477 |
|        |                       |          | 0.662                 | 0.779 | 0.858 | 1.135      | 1.204 | 1.075 | 0.252    | 0.256 | 0.286 |         |       |       |         |                                            |       |       |
|        |                       |          | 0.673                 | 0.779 | 0.777 | 1.041      | 1.086 | 0.995 | 0.251    | 0.257 | 0.287 |         |       |       |         |                                            |       |       |
|        |                       |          | 0.676                 | 0.759 | 0.740 | 0.990      | 1.032 | 0.954 | 0.251    | 0.257 | 0.287 |         |       |       |         |                                            |       |       |
|        |                       |          | 0.670                 | 0.772 | 0.792 | 1.055      | 1.107 | 1.008 | 0.251    | 0.257 | 0.287 |         |       |       |         |                                            |       |       |
|        |                       |          |                       |       |       | 1.057      |       |       | 0.265    |       |       | 0.396   | 0.498 | 0.518 | 0.763   | 0.519                                      | 0.653 | 0.678 |
| vector | 3                     | 1.25     | 0.725                 | 0.789 | 0.849 | 1.537      | 1.795 | 1.641 | 0.254    | 0.250 | 0.280 |         |       |       |         |                                            |       |       |
|        |                       |          | 0.741                 | 0.785 | 0.776 | 1.340      | 1.573 | 1.439 | 0.254    | 0.250 | 0.280 |         |       |       |         |                                            |       |       |
|        |                       |          | 0.746                 | 0.767 | 0.738 | 1.266      | 1.490 | 1.361 | 0.254    | 0.250 | 0.280 |         |       |       |         |                                            |       |       |
|        |                       |          | 0.737                 | 0.780 | 0.788 | 1.381      | 1.619 | 1.480 | 0.254    | 0.250 | 0.280 |         |       |       |         |                                            |       |       |
|        |                       |          |                       |       |       | 1.494      |       |       | 0.261    |       |       | 0.463   | 0.506 | 0.514 | 1.200   | 0.386                                      | 0.422 | 0.428 |
|        |                       |          | 0.678                 | 0.735 | 0.749 | 1.109      | 1.020 | 1.097 | 0.246    | 0.267 | 0.273 |         |       |       |         |                                            |       |       |
|        |                       |          | 0.689                 | 0.701 | 0.694 | 1.014      | 0.929 | 0.992 | 0.246    | 0.266 | 0.273 |         |       |       |         |                                            |       |       |
|        |                       |          | 0.692                 | 0.689 | 0.662 | 0.970      | 0.891 | 0.948 | 0.245    | 0.267 | 0.273 |         |       |       |         |                                            |       |       |
|        |                       |          | 0.686                 | 0.708 | 0.702 | 1.031      | 0.947 | 1.012 | 0.246    | 0.267 | 0.273 |         |       |       |         |                                            |       |       |
|        |                       |          |                       |       |       | 0.997      |       |       | 0.262    |       |       | 0.412   | 0.434 | 0.428 | 0.703   | 0.587                                      | 0.618 | 0.608 |
| vector | 4                     | 0.3125   | 0.787                 | 0.867 | 0.837 | 1.594      | 1.564 | 1.513 | 0.262    | 0.260 | 0.289 |         |       |       |         |                                            |       |       |
|        |                       |          | 0.803                 | 0.836 | 0.782 | 1.463      | 1.436 | 1.398 | 0.262    | 0.260 | 0.290 |         |       |       |         |                                            |       |       |
|        |                       |          | 0.804                 | 0.823 | 0.763 | 1.417      | 1.390 | 1.355 | 0.262    | 0.259 | 0.290 |         |       |       |         |                                            |       |       |
|        |                       |          | 0.798                 | 0.842 | 0.794 | 1.491      | 1.463 | 1.422 | 0.262    | 0.260 | 0.290 |         |       |       |         |                                            |       |       |
|        |                       |          |                       |       |       | 1.457      |       |       | 0.270    |       |       | 0.524   | 0.568 | 0.520 | 1.163   | 0.451                                      | 0.488 | 0.447 |
|        |                       |          | 0.656                 | 0.615 | 0.608 | 0.927      | 0.898 | 0.894 | 0.278    | 0.308 | 0.350 |         |       |       |         |                                            |       |       |
|        |                       |          | 0.662                 | 0.626 | 0.624 | 0.965      | 0.942 | 0.932 | 0.279    | 0.308 | 0.349 |         |       |       |         |                                            |       |       |
|        |                       |          | 0.658                 | 0.624 | 0.624 | 0.961      | 0.946 | 0.932 | 0.278    | 0.307 | 0.348 |         |       |       |         |                                            |       |       |
|        |                       |          | 0.659                 | 0.622 | 0.619 | 0.951      | 0.929 | 0.919 | 0.278    | 0.308 | 0.349 |         |       |       |         |                                            |       |       |
|        |                       |          |                       |       |       | 0.933      |       |       | 0.312    |       |       | 0.385   | 0.348 | 0.345 | 0.639   | 0.602                                      | 0.544 | 0.539 |
| vector | 5                     | 0.078125 | 0.884                 | 0.963 | 0.860 | 1.145      | 0.780 | 0.873 | 0.287    | 0.305 | 0.333 |         |       |       |         |                                            |       |       |
|        |                       |          | 0.897                 | 0.979 | 0.870 | 1.147      | 0.776 | 0.873 | 0.289    | 0.308 | 0.337 |         |       |       |         |                                            |       |       |
|        |                       |          | 0.917                 | 0.995 | 0.886 | 1.172      | 0.775 | 0.872 | 0.289    | 0.308 | 0.337 |         |       |       |         |                                            |       |       |
|        |                       |          | 0.899                 | 0.979 | 0.872 | 1.155      | 0.777 | 0.873 | 0.288    | 0.307 | 0.336 |         |       |       |         |                                            |       |       |
|        |                       |          |                       |       |       | 0.935      |       |       | 0.310    |       |       | 0.625   | 0.705 | 0.598 | 0.641   | 0.976                                      | 1.100 | 0.933 |
|        |                       |          | 0.766                 | 0.707 | 0.749 | 1.205      | 0.904 | 0.857 | 0.255    | 0.264 | 0.307 |         |       |       |         |                                            |       |       |
|        |                       |          | 0.761                 | 0.716 | 0.765 | 1.222      | 0.970 | 0.870 | 0.255    | 0.264 | 0.308 |         |       |       |         |                                            |       |       |
|        |                       |          | 0.739                 | 0.694 | 0.753 | 1.185      | 0.932 | 0.870 | 0.255    | 0.264 | 0.307 |         |       |       |         |                                            |       |       |
| SRSF1  |                       |          | 0.755                 | 0.706 | 0.756 | 1.204      | 0.935 | 0.866 | 0.275    | 0.286 | 0.307 |         |       |       |         |                                            |       |       |
|        |                       |          |                       |       |       | 1.002      |       |       | 0.289    |       |       | 0.481   | 0.432 | 0.482 | 0.708   | 0.680                                      | 0.610 | 0.680 |

|        |   |             |       |       |       |       |       |       |       |       |       |       |       |        |       |       |       |        |
|--------|---|-------------|-------|-------|-------|-------|-------|-------|-------|-------|-------|-------|-------|--------|-------|-------|-------|--------|
| vector | 6 | 0.01953125  | 1.183 | 1.189 | 1.028 | 1.422 | 1.203 | 1.110 | 0.250 | 0.255 | 0.308 |       |       |        |       |       |       |        |
|        |   |             | 1.044 | 1.055 | 0.932 | 1.309 | 1.237 | 1.126 | 0.250 | 1.256 | 0.309 |       |       |        |       |       |       |        |
|        |   |             | 0.990 | 0.999 | 0.895 | 1.268 | 1.206 | 1.134 | 0.250 | 0.256 | 0.309 |       |       |        |       |       |       |        |
|        |   |             | 1.072 | 1.081 | 0.952 | 1.333 | 1.215 | 1.123 | 0.250 | 0.279 | 0.309 |       |       |        |       |       |       |        |
|        |   |             |       |       |       |       |       |       |       |       |       | 0.798 | 0.807 | 0.678  | 0.930 | 0.858 | 0.868 | 0.729  |
| SRSF1  |   |             | 0.892 | 0.857 | 0.101 | 0.963 | 0.908 | 0.768 | 0.239 | 0.249 | 0.286 |       |       |        |       |       |       |        |
|        |   |             | 0.810 | 0.783 | 0.104 | 0.919 | 0.922 | 0.779 | 0.238 | 0.250 | 0.287 |       |       |        |       |       |       |        |
|        |   |             | 0.774 | 0.748 | 0.107 | 0.898 | 0.916 | 0.773 | 0.238 | 0.249 | 0.286 |       |       |        |       |       |       |        |
|        |   |             | 0.825 | 0.796 | 0.104 | 0.927 | 0.915 | 0.773 | 0.238 | 0.249 | 0.286 |       |       |        |       |       |       |        |
|        |   |             |       |       |       |       |       |       |       |       |       | 0.551 | 0.522 | -0.170 | 0.578 | 0.954 | 0.903 | -0.294 |
| vector | 7 | 0.004882813 | 1.359 | 1.179 | 1.150 | 1.391 | 1.003 | 1.031 | 0.232 | 0.237 | 0.273 |       |       |        |       |       |       |        |
|        |   |             | 1.219 | 1.050 | 1.033 | 1.277 | 0.984 | 1.047 | 0.233 | 0.237 | 0.275 |       |       |        |       |       |       |        |
|        |   |             | 1.161 | 0.991 | 0.988 | 1.249 | 0.975 | 1.050 | 0.232 | 0.237 | 0.274 |       |       |        |       |       |       |        |
|        |   |             | 1.246 | 1.073 | 1.057 | 1.306 | 0.987 | 1.043 | 0.232 | 0.237 | 0.274 |       |       |        |       |       |       |        |
|        |   |             |       |       |       |       |       |       |       |       |       | 0.972 | 0.799 | 0.783  | 0.818 | 1.189 | 0.977 | 0.957  |
| SRSF1  |   |             | 1.097 | 0.997 | 0.742 | 0.823 | 0.866 | 0.753 | 0.223 | 0.241 | 0.265 |       |       |        |       |       |       |        |
|        |   |             | 0.902 | 0.697 | 0.768 | 0.816 | 0.724 | 0.724 | 0.224 | 0.242 | 0.265 |       |       |        |       |       |       |        |
|        |   |             | 0.948 | 0.866 | 0.684 | 0.759 | 0.810 | 0.713 | 0.224 | 0.241 | 0.265 |       |       |        |       |       |       |        |
|        |   |             | 0.982 | 0.853 | 0.731 | 0.799 | 0.800 | 0.730 | 0.224 | 0.241 | 0.265 |       |       |        |       |       |       |        |
|        |   |             |       |       |       |       |       |       |       |       |       | 0.708 | 0.579 | 0.457  | 0.482 | 1.470 | 1.202 | 0.949  |
| vector | 8 | 0.001220703 | 1.023 | 0.931 | 0.770 | 0.993 | 0.917 | 0.725 | 0.235 | 0.249 | 0.292 |       |       |        |       |       |       |        |
|        |   |             | 0.966 | 0.872 | 0.738 | 0.954 | 0.888 | 0.726 | 0.236 | 0.249 | 0.293 |       |       |        |       |       |       |        |
|        |   |             | 0.939 | 0.855 | 0.726 | 0.931 | 0.889 | 0.723 | 0.236 | 0.249 | 0.293 |       |       |        |       |       |       |        |
|        |   |             | 0.976 | 0.886 | 0.748 | 0.959 | 0.898 | 0.725 | 0.236 | 0.249 | 0.293 |       |       |        |       |       |       |        |
|        |   |             |       |       |       |       |       |       |       |       |       | 0.702 | 0.612 | 0.474  | 0.567 | 1.238 | 1.079 | 0.836  |
| SRSF1  |   |             | 0.830 | 0.792 | 0.846 | 0.744 | 0.645 | 0.874 | 0.267 | 0.266 | 0.361 |       |       |        |       |       |       |        |
|        |   |             | 0.860 | 0.825 | 0.883 | 0.748 | 0.648 | 0.877 | 0.267 | 0.267 | 0.361 |       |       |        |       |       |       |        |
|        |   |             | 0.864 | 0.830 | 0.886 | 0.738 | 0.645 | 0.872 | 0.267 | 0.266 | 0.359 |       |       |        |       |       |       |        |
|        |   |             | 0.851 | 0.816 | 0.872 | 0.743 | 0.646 | 0.874 | 0.267 | 0.266 | 0.267 |       |       |        |       |       |       |        |
|        |   |             |       |       |       |       |       |       |       |       |       | 0.577 | 0.542 | 0.598  | 0.461 | 1.252 | 1.175 | 1.296  |



Figure 3F-G.Raw data for WB band analysis of apoptosis-related protein after knockdown of SRSF1 in K562 cells

|   | Scrambled | $\beta$ -Tublin | Caspase3/ $\beta$ -Tublin | sh-SRSF1 | $\beta$ -Tublin | Caspase3/ $\beta$ -Tublin |
|---|-----------|-----------------|---------------------------|----------|-----------------|---------------------------|
| 1 | 287396    | 513341          | 0.559853976               | 329736   | 340215          | 0.969198889               |
| 2 | 254833    | 491441          | 0.518542409               | 290033   | 342146          | 0.847687829               |
| 3 | 271591    | 486370          | 0.558404096               | 307358   | 317703          | 0.967438142               |

  

|   | Scrambled | $\beta$ -Tublin | Caspase8/ $\beta$ -Tublin | sh-SRSF1 | $\beta$ -Tublin | Caspase8/ $\beta$ -Tublin |
|---|-----------|-----------------|---------------------------|----------|-----------------|---------------------------|
| 1 | 264158    | 550952          | 0.479457376               | 363807   | 362826          | 1.002703775               |
| 2 | 260341    | 526036          | 0.494910995               | 358239   | 326803          | 1.096192507               |
| 3 | 255191    | 522814          | 0.488110494               | 347400   | 323660          | 1.073348576               |

  

|   | Scrambled | $\beta$ -Tublin | Caspase9/ $\beta$ -Tublin | sh-SRSF1 | $\beta$ -Tublin | Caspase9/ $\beta$ -Tublin |
|---|-----------|-----------------|---------------------------|----------|-----------------|---------------------------|
| 1 | 259712    | 513341          | 0.505924912               | 324011   | 340215          | 0.952371295               |
| 2 | 256752    | 491441          | 0.522447252               | 310908   | 342146          | 0.908699795               |
| 3 | 244492    | 486370          | 0.502687255               | 300570   | 317703          | 0.946072275               |

Figure 3F-G.Raw data for WB band analysis of apoptosis-related protein after knockdown of SRSF1 in THP-1 cells

|   | Scrambled | $\beta$ -Tublin | Caspase3/ $\beta$ -Tublin | sh-SRSF1 | $\beta$ -Tublin | Caspase3/ $\beta$ -Tublin |
|---|-----------|-----------------|---------------------------|----------|-----------------|---------------------------|
| 1 | 156874    | 338945          | 0.462830253               | 219723   | 297335          | 0.738974557               |
| 2 | 167687    | 319660          | 0.52457924                | 229879   | 274529          | 0.837357802               |
| 3 | 161713    | 317076          | 0.510013372               | 225870   | 278082          | 0.812242432               |

  

|   | Scrambled | $\beta$ -Tublin | Caspase8/ $\beta$ -Tublin | sh-SRSF1 | $\beta$ -Tublin | Caspase8/ $\beta$ -Tublin |
|---|-----------|-----------------|---------------------------|----------|-----------------|---------------------------|
| 1 | 258560    | 383096          | 0.674922213               | 312170   | 461983          | 0.675717505               |
| 2 | 257275    | 381731          | 0.673969366               | 308469   | 467540          | 0.659770287               |
| 3 | 264857    | 378679          | 0.699423522               | 318232   | 458299          | 0.694376379               |

  

|   | Scrambled | $\beta$ -Tublin | Caspase9/ $\beta$ -Tublin | sh-SRSF1 | $\beta$ -Tublin | Caspase9/ $\beta$ -Tublin |
|---|-----------|-----------------|---------------------------|----------|-----------------|---------------------------|
| 1 | 568304    | 338945          | 1.676685008               | 625655   | 297335          | 2.104209057               |
| 2 | 592110    | 319660          | 1.852311831               | 663702   | 274529          | 2.417602512               |
| 3 | 586057    | 317076          | 1.848317123               | 657103   | 278082          | 2.362982861               |
